# Supplementary material
Source: MDPI journal article supplement (https://www.mdpi.com/2079-6412/7/12/210)
Supplement: s1 [file s1]

## Supplementary Materials

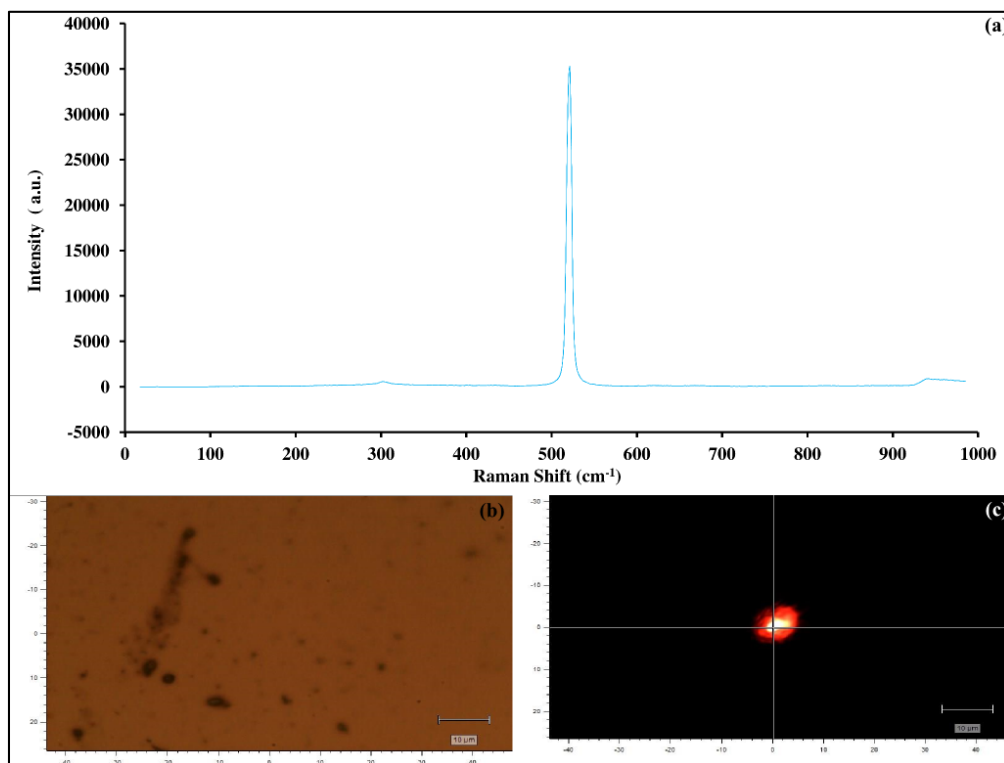

**Figure S1.** (a) Raman spectrum of solid silicon standard showing Raman peak at  $520.5\text{ cm}^{-1}$ , which indicates that the Raman system is wavenumber-calibrated; (b) optical micrograph of solid silicon; and (c) optical micrograph of the laser spot.

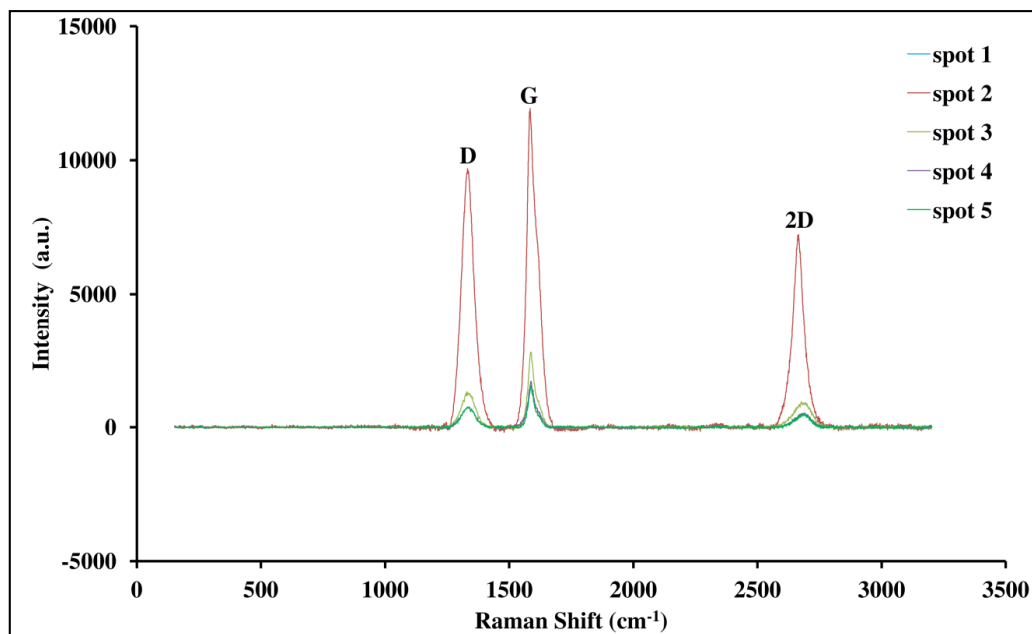

**Figure S2.** Raman spectrum of graphene-coated Cu-Ni alloy at different spots, showing the uniformity of graphene over the sample surface.
